# Supplementary material for: Lipid nanoparticles as efficient verteporfin nanocarriers for photodynamic therapy of cancer
Source: Royal Society of Chemistry journal article supplement (doi:10.1039/d3ma00797a), 2024-01-01
Supplement: d3ma00797a1.pdf [file d3ma00797a1.pdf]

## Supporting information

### **Lipid nanoparticles as efficient verteporfin nanocarriers for photodynamic therapy of cancer**

Tomás Mendes<sup>1</sup>, Andreia Granja<sup>1,\*</sup> and Salette Reis<sup>1</sup>.

<sup>1</sup> LAQV, REQUIMTE, Departamento de Ciências Químicas, Faculdade de Farmácia, Universidade do Porto, R. Jorge de Viterbo Ferreira 228, 4050-313, Porto, Portugal.

\*corresponding author: [aagranja@ff.up.pt](mailto:aagranja@ff.up.pt)

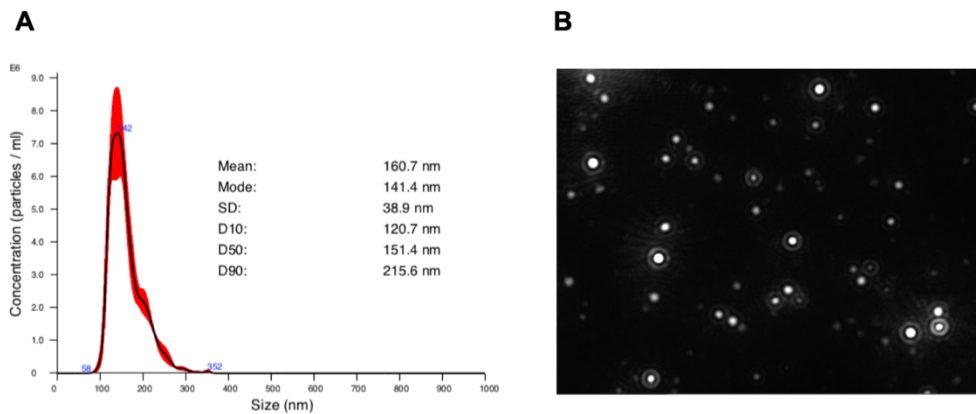

**Figure S1.** Particle size determinations obtained by NTA. Particle size distribution graph (**A**) and corresponding frame from the NTA captured video (**B**).

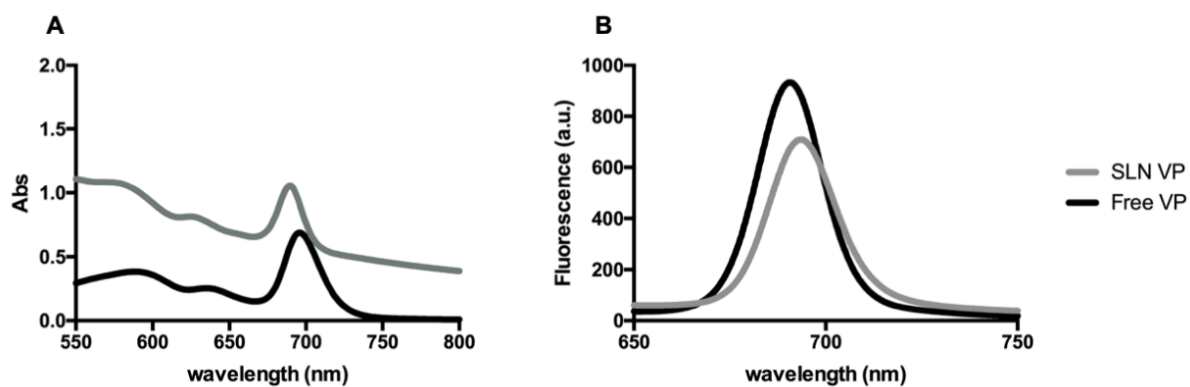

**Figure S2.** Absorption spectra (**A**) and fluorescence emission spectra (excitation at 581 nm) (**B**) of free VP and SLN VP (16  $\mu$ M of VP)

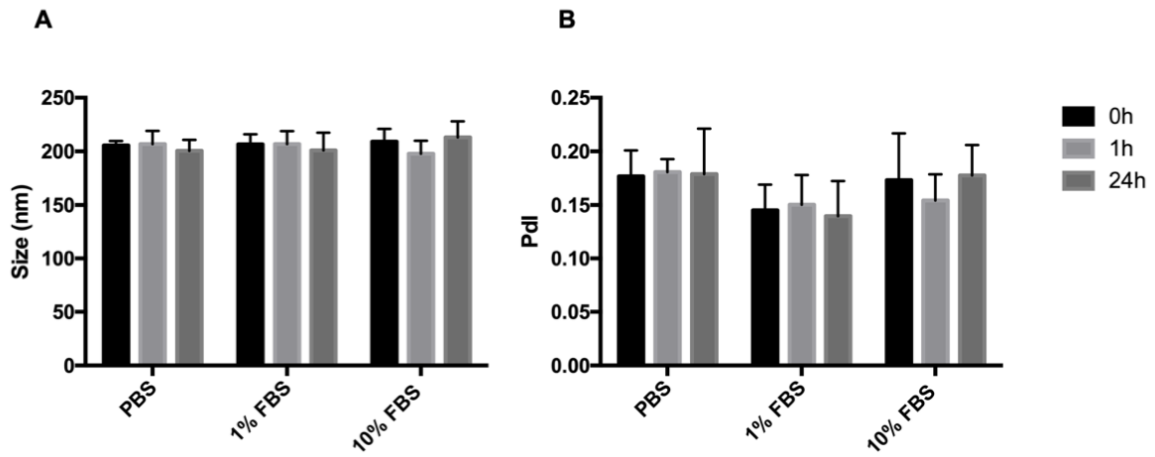

**Figure S3. Nanoparticle colloidal stability into different biological relevant media.** Nanoparticles were incubated with PBS, PBS with 1% FBS and PBS with 10% FBS for 1 h and 24 h at 37 °C and particle size and Pdl were analyzed using a ZetaPALS Analyzer (Brookhaven Instruments Corporation; Software: Particle Sizing v.5 Brookhaven Instruments; Holtsville, NY, USA).

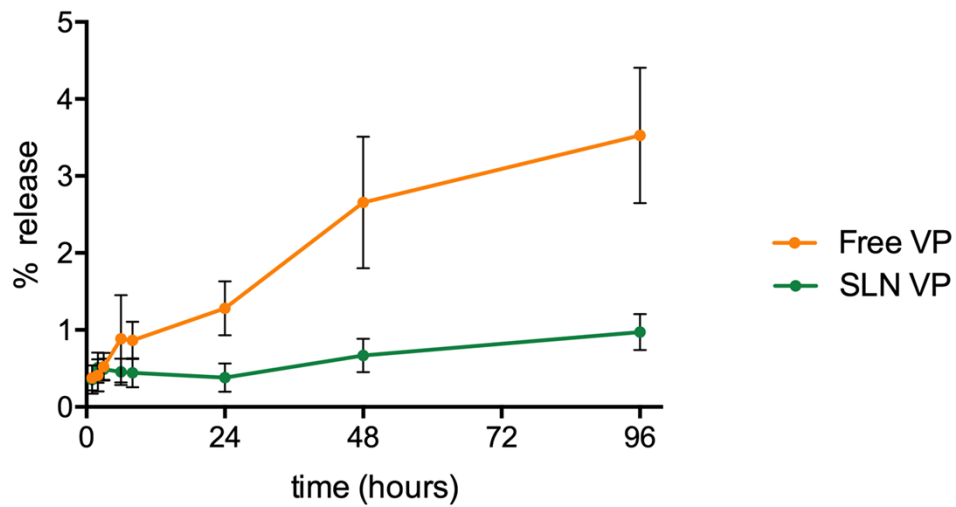

**Figure S4.** Cumulative release of VP (free and SLN-loaded) in PBS pH 7.4 (5% v/v of Tween 80). Data are expressed as mean  $\pm$  SD (n=3)

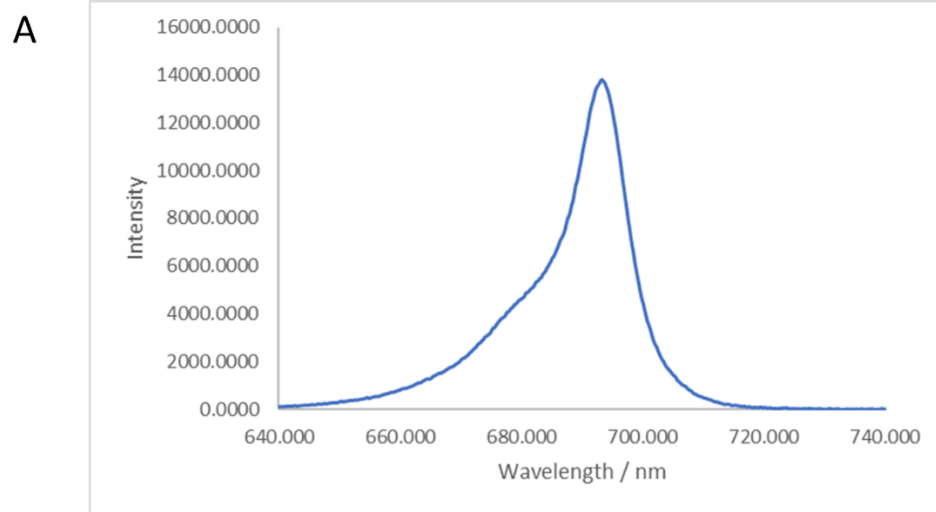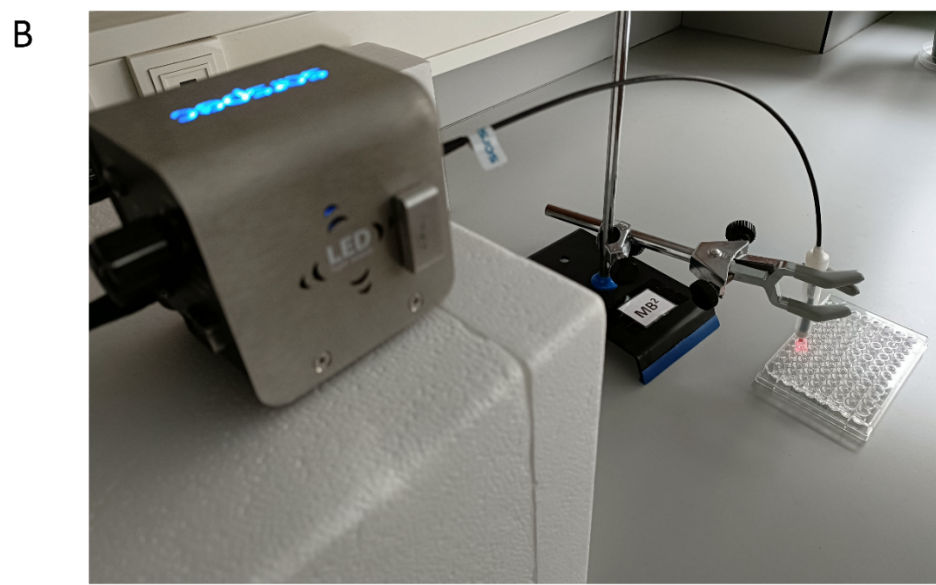

**Figure S5.** LED light source emission spectrum (**A**) and setup for the LED irradiation experiments (**B**)
